# Supplementary material for: Visible light activity of Bi2WO6@TCNQ with core–shell structure in phenol degradation
Source: Royal Society of Chemistry journal article supplement (doi:10.1039/c8ra06304d), 2018-01-01
Supplement: c8ra06304d1.pdf [file c8ra06304d1.pdf]

# Supporting Information

## Visible light activity of $\text{Bi}_2\text{WO}_6@$ TCNQ with core-shell structure in phenol degradation

Yunxia WEI<sup>1</sup>, Wenlu LI<sup>2</sup>, Hong MIAO<sup>2</sup>, Hanjie ZHANG<sup>2</sup>, Mingguang MA<sup>1\*</sup>

<sup>1</sup>Provincial key laboratory of Gansu higher education for city environmental pollution control,  
College of Chemistry and Chemical Engineering, Lanzhou City University, Lanzhou 730070, P. R.  
China

<sup>2</sup>Department of Chemistry, Tsinghua University, Beijing 100084, P. R. China

\*Corresponding Author's Email: mamg-001@163.com

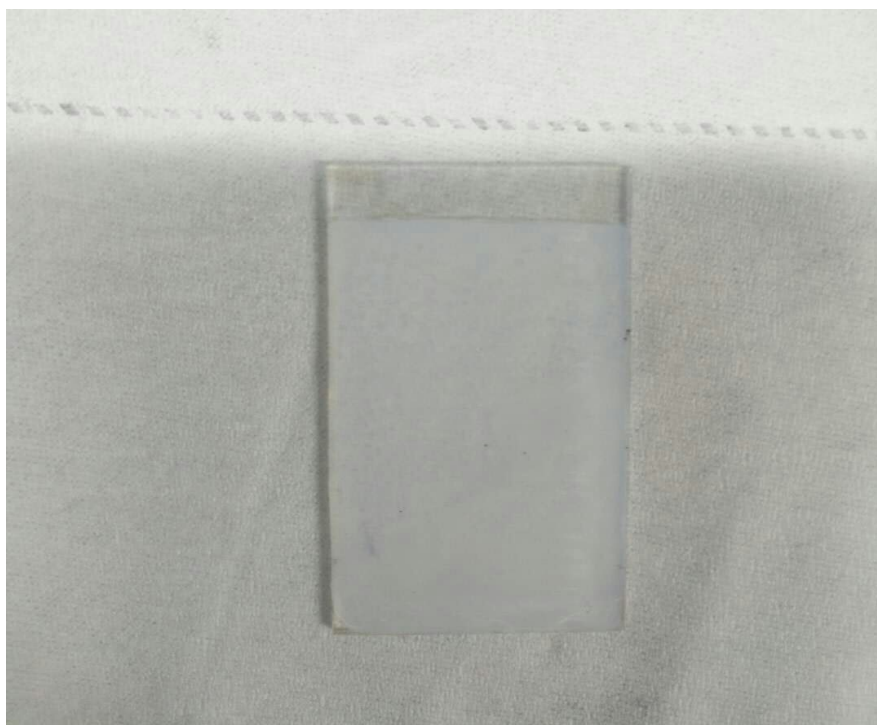

**Fig 1S** Digital photos of the working electrodes

The working electrodes were prepared as follows: A composite (3 mg) was suspended in 1 mL of deionized water under ultrasound. A slurry was obtained and all dip-coated onto an indium tin oxide (ITO) glass electrode. Our experiment ensures that the amount of catalyst prepared on the electrode is the same by the above method.

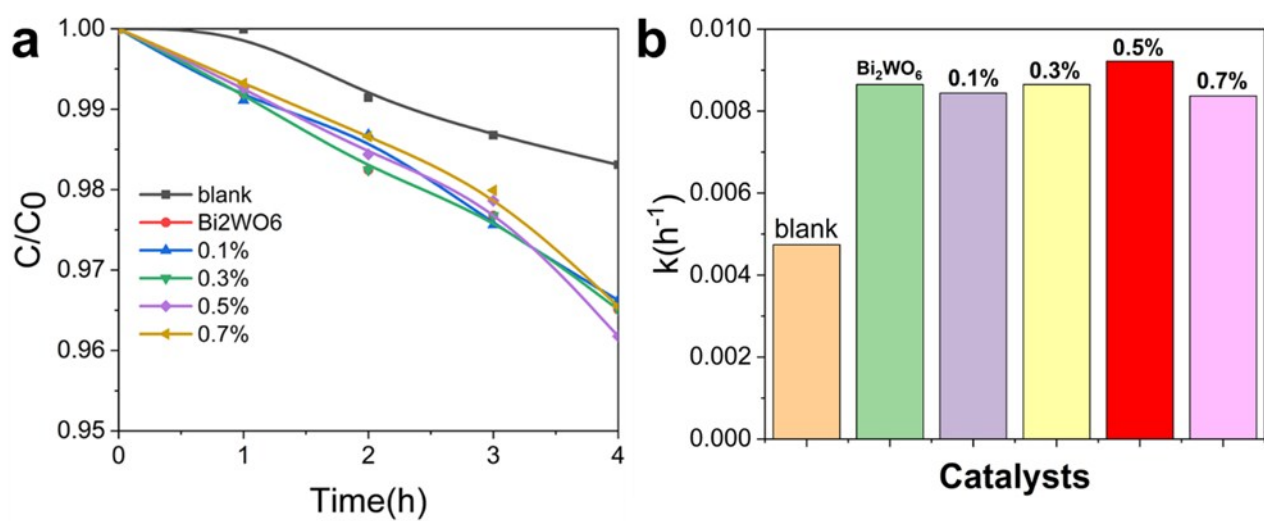

**Fig S2** Comparison of different photocatalysts for photodegradation of phenol for 10 ppm

when the phenol initial concentration is 10ppm, there was little improvement in catalytic activity compared with  $\text{Bi}_2\text{WO}_6$  due to the high concentrations of phenol blocked the active site of the photocatalyst.
